# Supplementary material
Source: publisher figshare collection journal article supplement (https://tandf.figshare.com/ndownloader/files/2057650)
Supplement: Supplementary file 1 [file 2057650]

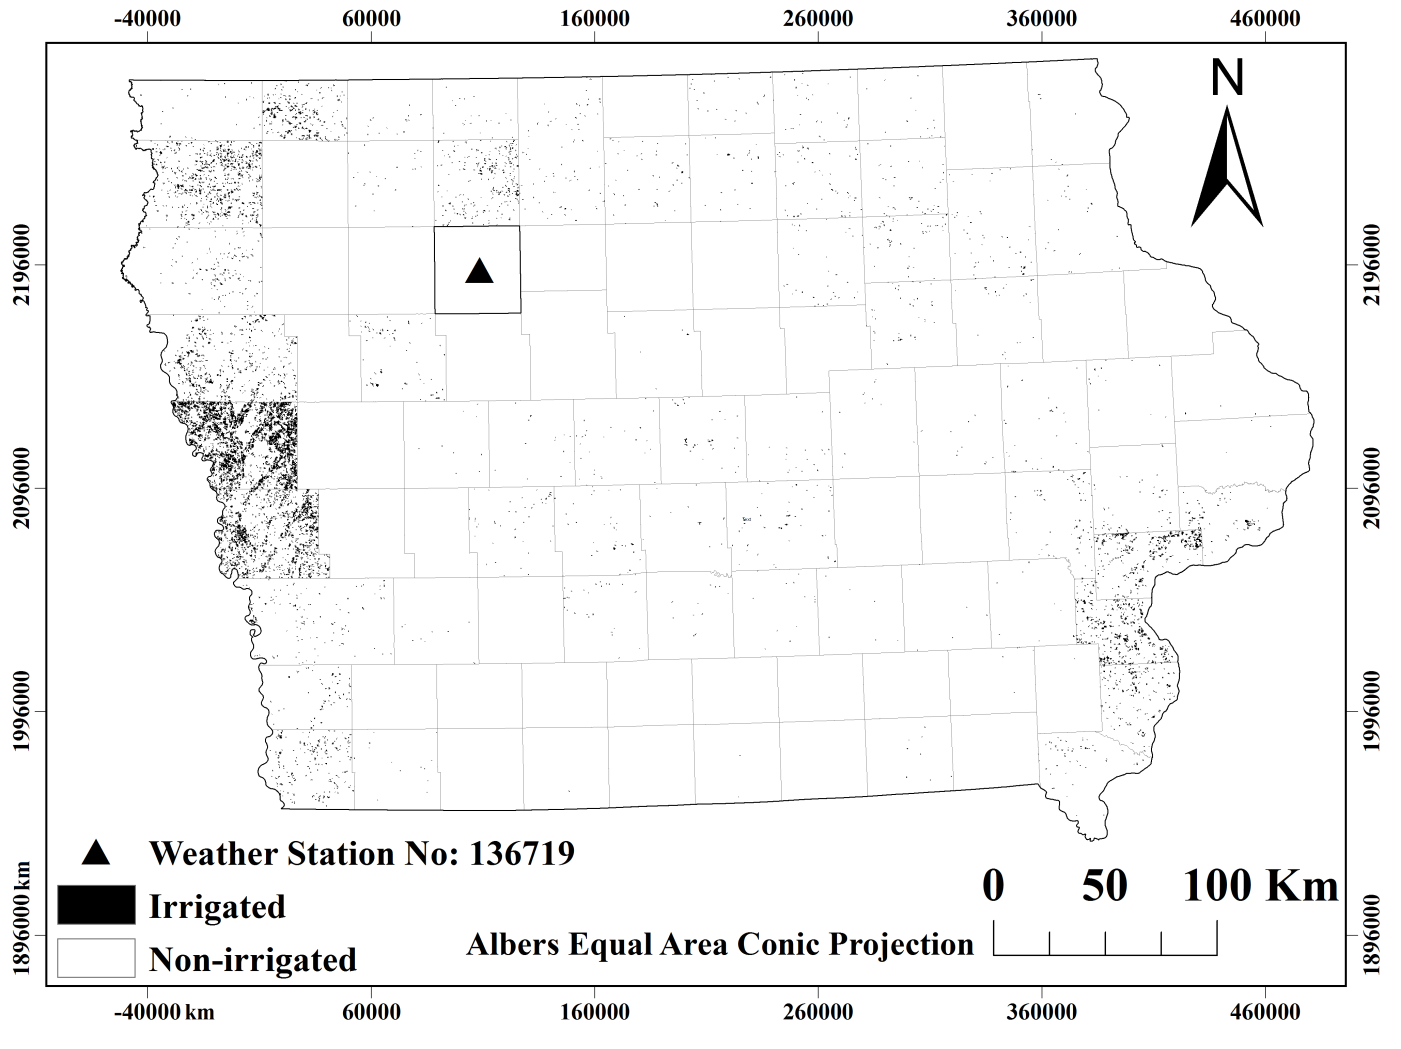


Figure S1 - Irrigated agricultural fields of Iowa. The map was extracted from the union of the 2002 and 2007 Moderate Resolution Imaging Spectroradiometer (MODIS) Irrigated Agriculture Datasets (MIrAD-US). The bold polygon shows the location of Pocahontas County in Iowa.


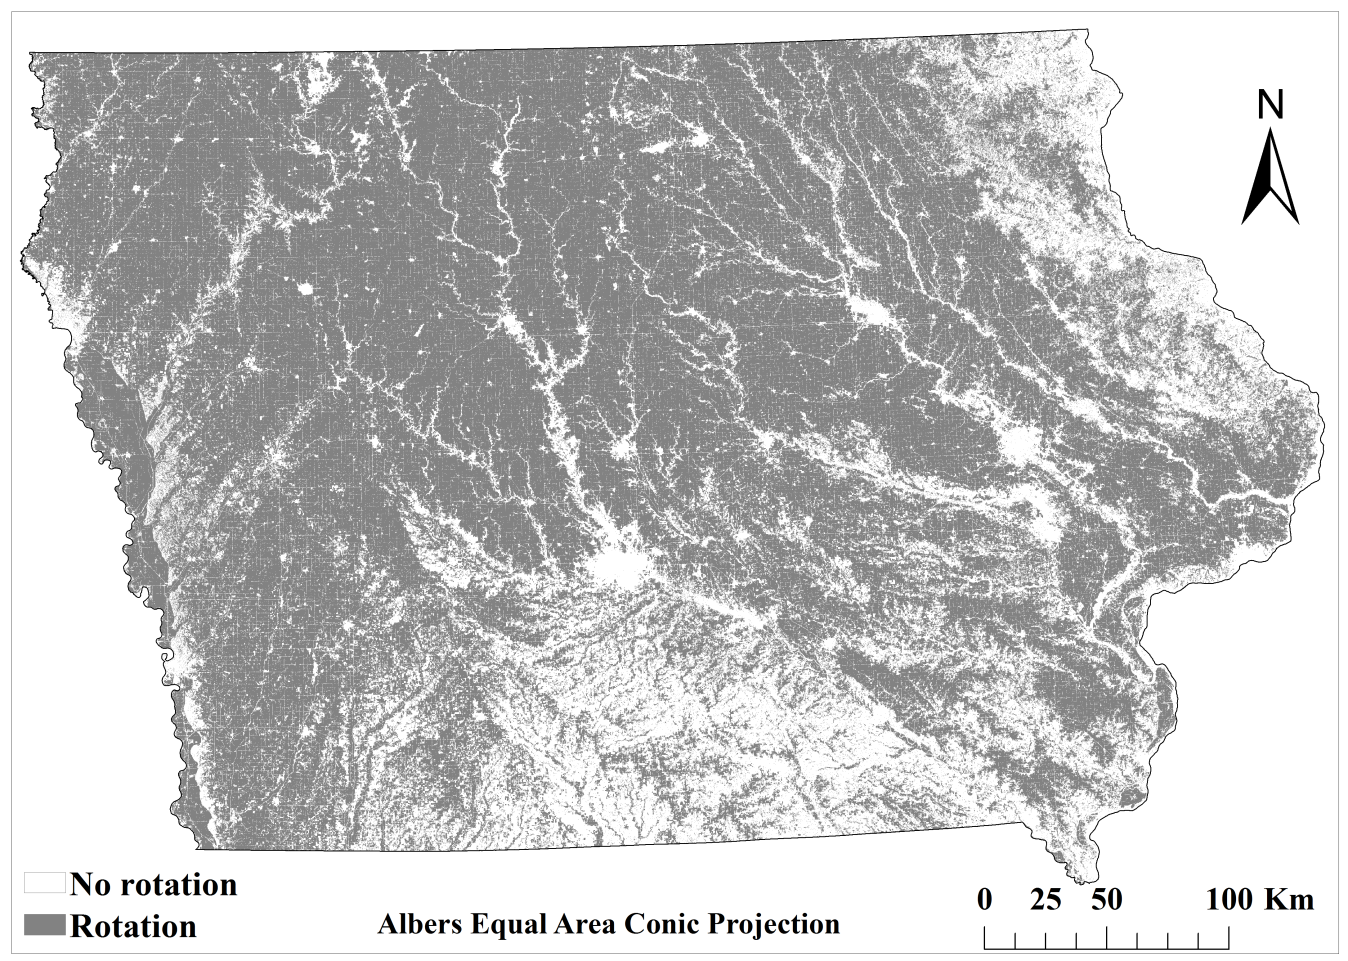


Figure S2 – The spatial distribution of agricultural fields with one or more crop rotations across Iowa between 2000 and 2011.
